# Supplementary material
Source: HighWire-hosted journal article supplement (https://thorax.bmj.com/content/74/10/934)
Supplement: inline-supplementary-material-1 [file inline-supplementary-material-1.pdf]

**Supplementary**

**$\beta_2$ -Adrenergic Genotypes and Risk of Severe Exacerbations**

**in COPD: a prospective cohort study**

Truls Sylan Ingebrigtsen, Jørgen Vestbo, Line Rode, Jacob Louis Marott, Peter Lange, and

Børge Grønne Nordestgaard

**Table S1.** Baseline characteristics across the Gly16Arg (rs1042713, c.46G>A) polymorphism. Upper part shows Copenhagen General Population Study and lower part shows Copenhagen City Heart Study.

| Characteristic                                         | rs1042713                        |                                        |                                  | p-value |
|--------------------------------------------------------|----------------------------------|----------------------------------------|----------------------------------|---------|
|                                                        | 16Gly<br>homozygotes<br>N=36,768 | 16Gly/Arg<br>heterozygotes<br>N=44,860 | 16Arg<br>homozygotes<br>N=13,575 |         |
| FEV <sub>1</sub> - liters                              | 2.98 ±0.88                       | 2.97 ±0.89                             | 2.98 ±0.89                       | 0.14    |
| FEV <sub>1</sub> - % of predicted value                | 97.0 ±16.9                       | 96.7 ±16.8                             | 96.4 ±16.8                       | 0.0003  |
| FEV <sub>1</sub> /FVC                                  | 0.77 ±0.08                       | 0.77 ±0.08                             | 0.77 ±0.08                       | 0.37    |
| Male sex - no. (%)                                     | 16,695 (45.1)                    | 20,148 (44.6)                          | 6,245 (45.6)                     | 0.08    |
| Age - yr                                               | 57.9 ±13.1                       | 58.0 ±13.1                             | 57.8 ±13.0                       | 0.36    |
| Current smoking - no. (%)                              | 6,544 (18.4)                     | 7,999 (18.4)                           | 2,480 (18.9)                     |         |
| Former smoking - no. (%)                               | 14,661 (41.2)                    | 17,869 (41.2)                          | 5,411 (41.1)                     | 0.79†   |
| Never smoking - no. (%)                                | 14,374 (40.4)                    | 17,532 (40.4)                          | 5,259 (40.0)                     |         |
| Frequent Previous<br>Respiratory Infections* - no. (%) | 8,640 (23.7)                     | 10,441 (23.4)                          | 3,110 (23.0)                     | 0.31    |
| Copenhagen City Heart Study                            | 16Gly<br>homozygotes<br>N=3,970  | 16Gly/Arg<br>heterozygotes<br>N=4,751  | 16Arg<br>homozygotes<br>N=1,516  |         |
| FEV <sub>1</sub> - liters                              | 2.79 ±1.03                       | 2.79 ±1.03                             | 2.81 ±1.06                       | 0.74    |
| FEV <sub>1</sub> - % of predicted value                | 92.2 ±20.1                       | 92.0 ±20.3                             | 92.3 ±20.3                       | 0.87    |
| FEV <sub>1</sub> /VC                                   | 0.77 ±0.09                       | 0.77 ±0.09                             | 0.77 ±0.10                       | 0.94    |
| Male sex - no. (%)                                     | 1754 (43.7)                      | 2196 (45.7)                            | 687 (44.8)                       | 0.18    |
| Age - yr                                               | 56.6 ±16.1                       | 56.6 ±16.3                             | 56.2 ±16.4                       | 0.62    |
| Current smoking - no. (%)                              | 1887 (47.3)                      | 2233 (46.7)                            | 723 (47.5)                       |         |
| Former smoking - no. (%)                               | 1069 (26.8)                      | 1226 (25.6)                            | 388 (25.5)                       | 0.39†   |
| Never smoking - no. (%)                                | 1033 (25.9)                      | 1322 (27.7)                            | 411 (27.0)                       |         |
| Frequent Previous<br>Respiratory Infections* - no. (%) | 859 (21.7)                       | 1062 (22.4)                            | 347 (22.9)                       | 0.57    |

\*At least five respiratory infections during the preceding ten years requiring consulting a doctor and/or staying home from work.  
†Compares current, former and never smoking.  
Plus-minus values are mean ±SD

**Table S2.** Baseline characteristics across the Gly16Arg (rs1042713, c.46G>A) polymorphism. Upper part shows individuals with COPD in the Copenhagen General Population Study and lower part shows individuals with COPD in the Copenhagen City Heart Study.

| Characteristic                                         | rs1042713                       |                                       |                               | p-value |
|--------------------------------------------------------|---------------------------------|---------------------------------------|-------------------------------|---------|
|                                                        | 16Gly<br>homozygotes<br>N=1,978 | 16Gly/Arg<br>heterozygotes<br>N=2,488 | 16Arg<br>homozygotes<br>N=753 |         |
| <b>COPD in<br/>Copenhagen General Population Study</b> |                                 |                                       |                               |         |
| FEV <sub>1</sub> - liters                              | 1.83 ±0.59                      | 1.81 ±0.61                            | 1.83 ±0.60                    | 0.54    |
| FEV <sub>1</sub> - % of predicted value                | 65.5 ±11.8                      | 65.1 ±12.3                            | 64.7 ±12.0                    | 0.29    |
| FEV <sub>1</sub> /FVC                                  | 0.61 ±0.08                      | 0.61 ±0.08                            | 0.60 ±0.08                    | 0.46    |
| Male sex - no. (%)                                     | 960 (48.5)                      | 1186 (47.7)                           | 398 (52.9)                    | 0.04    |
| Age - yr                                               | 66.6 ±10.7                      | 66.9 ±11.0                            | 66.7 ±10.8                    | 0.59    |
| Breathlessness* - no. (%)                              | 373 (18.9)                      | 463 (18.6)                            | 131 (17.4)                    | 0.67    |
| Current smoking - no. (%)                              | 778 (40.4)                      | 985 (40.7)                            | 301 (41.0)                    |         |
| Former smoking - no. (%)                               | 860 (44.6)                      | 1081 (44.7)                           | 327 (44.6)                    | 0.99 †† |
| Never smoking - no. (%)                                | 290 (15.0)                      | 355 (14.7)                            | 106 (14.4)                    |         |
| Frequent Previous<br>Respiratory Infections† - no. (%) | 771 (39.9)                      | 948 (38.8)                            | 292 (39.5)                    | 0.76    |
| Any inhalants‡ - no. (%)                               | 301 (15.2)                      | 405 (16.3)                            | 112 (14.9)                    | 0.50    |
| Long-acting β <sub>2</sub> -agonists - no. (%)         | 175 (8.8)                       | 264 (10.6)                            | 78 (10.4)                     |         |
| Long-acting anticholinergics - no. (%)                 | 115 (5.8)                       | 158 (6.4)                             | 38 (5.0)                      | 0.39    |
| <b>COPD in<br/>Copenhagen City Heart Study</b>         |                                 |                                       |                               |         |
|                                                        | 16Gly<br>homozygotes<br>N=344   | 16Gly/Arg<br>heterozygotes<br>N=414   | 16Arg<br>Homozygotes<br>N=122 | p-value |
| FEV <sub>1</sub> - liters                              | 1.67 ±0.61                      | 1.65 ±0.58                            | 1.57 ±0.60                    | 0.30    |
| FEV <sub>1</sub> - % of predicted value                | 61.6 ±14.2                      | 61.2 ±14.1                            | 60.0 ±14.3                    | 0.55    |
| FEV <sub>1</sub> /FVC                                  | 0.61 ±0.07                      | 0.61 ±0.08                            | 0.59 ±0.09                    | 0.08    |
| Male sex - no. (%)                                     | 187 (54.4)                      | 230 (55.6)                            | 63 (51.6)                     | 0.74    |
| Age - yr                                               | 67.2 ±9.1                       | 67.0 ±9.3                             | 67.6 ±9.7                     | 0.81    |
| Breathlessness* - no. (%)                              | 101 (29.6)                      | 114 (27.7)                            | 35 (28.9)                     | 0.85    |
| Current smoking - no. (%)                              | 230 (67.8)                      | 278 (67.6)                            | 78 (65.0)                     |         |
| Former smoking - no. (%)                               | 83 (24.5)                       | 103 (25.1)                            | 28 (23.3)                     | 0.64 †† |
| Never smoking - no. (%)                                | 26 (7.7)                        | 30 (7.3)                              | 14 (11.7)                     |         |
| Frequent Previous<br>Respiratory Infections† - no. (%) | 111 (32.8)                      | 137 (33.8)                            | 38 (31.7)                     | 0.90    |

\*A score on the Modified Medical Research Council Scale equal to or larger than two.

†At least five respiratory infections during the preceding ten years requiring consulting a doctor and/or staying home from work

‡Short-acting β<sub>2</sub>-agonists, long-acting β<sub>2</sub>-agonists with or without inhaled corticosteroids, or long-acting anticholinergics.

†† Compares current, former and never smoking

Plus-minus values are mean ±SD

**Table S3.** Baseline characteristics across the Gln27Glu (rs1042714, c.79C>G) polymorphism. Upper part shows Copenhagen General Population Study and lower part shows Copenhagen City Heart Study.

| Characteristic                                         | rs1042714                        |                                        |                                  | p-value |
|--------------------------------------------------------|----------------------------------|----------------------------------------|----------------------------------|---------|
|                                                        | 27Gln<br>homozygotes<br>N=29,042 | 27Gln/Glu<br>heterozygotes<br>N=46,450 | 27Glu<br>homozygotes<br>N=18,366 |         |
| <b>Copenhagen General Population Study</b>             |                                  |                                        |                                  |         |
| FEV <sub>1</sub> - liters                              | 2.98 ±0.89                       | 2.98 ±0.88                             | 2.98 ±0.88                       | 0.99    |
| FEV <sub>1</sub> - % of predicted value                | 96.7 ±16.8                       | 96.8 ±16.8                             | 96.9 ±17.1                       | 0.52    |
| FEV <sub>1</sub> /FVC                                  | 0.77 ±0.08                       | 0.77 ±0.08                             | 0.77 ±0.08                       | 0.32    |
| Male sex - no. (%)                                     | 13,109 (44.8)                    | 21,081 (45.0)                          | 8,307 (44.9)                     | 0.82    |
| Age - yr                                               | 57.9 ±13.1                       | 57.9 ±13.1                             | 58.0 ±13.1                       | 0.59    |
| Current smoking - no. (%)                              | 5,202 (18.5)                     | 8,329 (18.5)                           | 3,291 (18.5)                     | 0.86†   |
| Former smoking - no. (%)                               | 11,545 (41.1)                    | 18,471 (41.1)                          | 7,380 (41.5)                     |         |
| Never smoking - no. (%)                                | 11,351 (40.4)                    | 18,155 (40.4)                          | 7,103 (40.0)                     |         |
| Frequent Previous<br>Respiratory Infections* - no. (%) | 6,750 (23.4)                     | 10,747 (23.3)                          | 4,389 (24.1)                     | 0.10    |
| <b>Copenhagen City Heart Study</b>                     |                                  |                                        |                                  |         |
|                                                        | 27Gln<br>homozygotes<br>N=3,296  | 27Gln/Glu<br>heterozygotes<br>N=4,949  | 27Glu<br>homozygotes<br>N=1,986  | p-value |
| FEV <sub>1</sub> - liters                              | 2.81 ±1.04                       | 2.77 ±1.03                             | 2.80 ±1.02                       | 0.25    |
| FEV <sub>1</sub> - % of predicted value                | 92.4 ±20.0                       | 91.8 ±20.5                             | 92.4 ±19.8                       | 0.30    |
| FEV <sub>1</sub> /FVC                                  | 0.78 ±0.09                       | 0.77 ±0.10                             | 0.77 ±0.09                       | 0.11    |
| Male sex - no. (%)                                     | 1,481 (44.5)                     | 2,261 (45.1)                           | 891 (44.4)                       | 0.80    |
| Age - yr                                               | 56.0 ±16.6                       | 56.9 ±16.0                             | 56.6 ±16.2                       | 0.06    |
| Current smoking - no. (%)                              | 1,544 (46.7)                     | 2,340 (47.0)                           | 955 (47.7)                       | 0.33†   |
| Former smoking - no. (%)                               | 838 (25.4)                       | 1,305 (26.2)                           | 539 (27.0)                       |         |
| Never smoking - no. (%)                                | 921 (27.9)                       | 1,338 (26.9)                           | 506 (25.3)                       |         |
| Frequent Previous<br>Respiratory Infections* - no. (%) | 740 (22.5)                       | 1,111 (22.5)                           | 415 (20.9)                       | 0.29    |

\*At least five respiratory infections during the preceding ten years requiring consulting a doctor and/or staying home from work

†Compares current, former and never smoking.

Plus-minus values are mean ±SD

**Table S4.** Baseline characteristics across the Gln27Glu (rs1042714, c.79C>G) polymorphism. Upper part shows individuals with COPD in the Copenhagen General Population Study and lower part shows individuals with COPD in the Copenhagen City Heart Study.

| Characteristic                                         | rs1042714                       |                                       |                                 | p-value |
|--------------------------------------------------------|---------------------------------|---------------------------------------|---------------------------------|---------|
|                                                        | 27Gln<br>homozygotes<br>N=1,553 | 27Gln/Glu<br>heterozygotes<br>N=2,576 | 27Glu<br>homozygotes<br>N=1,031 |         |
| <b>COPD in<br/>Copenhagen General Population Study</b> |                                 |                                       |                                 |         |
| FEV <sub>1</sub> -liters                               | 1.82 ±0.59                      | 1.83 ±0.62                            | 1.81 ±0.57                      | 0.70    |
| FEV <sub>1</sub> - % of predicted value                | 65.0 ±12.1                      | 65.2 ±12.1                            | 65.2 ±12.0                      | 0.86    |
| FEV <sub>1</sub> /FVC                                  | 0.60 ±0.08                      | 0.61 ±0.08                            | 0.61 ±0.08                      | 0.59    |
| Male sex - no. (%)                                     | 777 (50.0)                      | 1,256 (48.8)                          | 486 (47.1)                      | 0.35    |
| Age – yr                                               | 67.1 ±10.7                      | 66.6 ±11.1                            | 66.6 ±10.6                      | 0.33    |
| Breathlessness* - no. (%)                              | 309 (19.9)                      | 461 (17.9)                            | 186 (18.0)                      | 0.25    |
| Current smoking - no. (%)                              | 643 (42.4)                      | 993 (39.7)                            | 405 (40.2)                      | 0.51 †† |
| Former smoking - no. (%)                               | 660 (43.6)                      | 1,130 (45.1)                          | 453 (45.0)                      |         |
| Never smoking - no. (%)                                | 212 (14.0)                      | 380 (15.2)                            | 149 (14.8)                      |         |
| Frequent Previous<br>Respiratory Infections† - no. (%) | 614 (40.2)                      | 978 (38.8)                            | 398 (39.5)                      | 0.69    |
| Any inhalants‡ - no. (%)                               | 250 (16.1)                      | 405 (15.7)                            | 156 (15.1)                      | 0.80    |
| Long-acting β <sub>2</sub> -agonists - no. (%)         | 164 (10.6)                      | 253 (9.8)                             | 94 (9.1)                        | 0.48    |
| Long-acting anticholinergics - no. (%)                 | 102 (6.6)                       | 143 (5.6)                             | 61 (5.9)                        | 0.41    |
| <b>COPD in<br/>Copenhagen City Heart Study</b>         |                                 |                                       |                                 |         |
|                                                        | 27Gln<br>homozygotes<br>N=256   | 27Gln/Glu<br>heterozygotes<br>N=456   | 27Glu<br>homozygotes<br>N=167   | p-value |
| FEV <sub>1</sub> - liters                              | 1.62 ±0.61                      | 1.63 ±0.56                            | 1.75 ±0.66                      | 0.05    |
| FEV <sub>1</sub> - % of predicted value                | 60.3 ±14.8                      | 61.0 ±13.7                            | 63.1 ±14.2                      | 0.13    |
| FEV <sub>1</sub> /FVC                                  | 0.60 ±0.08                      | 0.61 ±0.08                            | 0.62 ±0.07                      | 0.14    |
| Male sex - no. (%)                                     | 136 (53.1)                      | 246 (53.9)                            | 97 (58.1)                       | 0.57    |
| Age – yr                                               | 67.4 ±9.3                       | 67.3 ±9.2                             | 66.3 ±9.4                       | 0.43    |
| Breathlessness* - no. (%)                              | 78 (30.8)                       | 132 (29.1)                            | 40 (24.1)                       | 0.31    |
| Current smoking - no. (%)                              | 169 (67.1)                      | 299 (66.3)                            | 118 (71.1)                      | 0.50 †† |
| Former smoking - no. (%)                               | 58 (23.0)                       | 119 (26.4)                            | 36 (21.7)                       |         |
| Never smoking - no. (%)                                | 25 (9.9)                        | 33 (7.3)                              | 12 (7.2)                        |         |
| Frequent Previous<br>Respiratory Infections† - no. (%) | 78 (31.2)                       | 154 (34.5)                            | 54 (32.5)                       | 0.66    |

\*A score on the Modified Medical Research Council Scale equal to or larger than two.

†At least five respiratory infections during the preceding ten years requiring consulting a doctor and/or staying home from work

‡Short-acting β<sub>2</sub>-agonists, long-acting β<sub>2</sub>-agonists with or without inhaled corticosteroids, or long-acting anticholinergics.

†† Compares current, former and never smoking.

Plus-minus values are mean ±SD

**Table S5.** Upper part shows unadjusted competing risk regression analyses of the association between the single nucleotide polymorphisms Gly16Arg (rs1042713) and Gln27Glu (rs1042714) and COPD mortality in the Copenhagen General Population Study. Middle part shows competing risk regression analyses of the association between the single nucleotide polymorphisms Gly16Arg (rs1042713) and Gln27Glu (rs1042714) and severe exacerbations in the Copenhagen General Population Study adjusted for smoking status (never/former/current). Lower part shows unadjusted competing risk regression analyses of the association between the rare variant Thr164Ile (rs1800888) and severe exacerbations in the Copenhagen General Population Study

| <b>Upper part<br/>(COPD mortality, unadjusted)</b>                     |                             |
|------------------------------------------------------------------------|-----------------------------|
| Genotype                                                               | HR (95% CI, P-value)        |
| Gly16Gly (reference)                                                   | Reference                   |
| Gly16Arg                                                               | 0.69 (0.26-1.82, P=0.46)    |
| Arg16Arg                                                               | 0.58 (0.11-2.96, P=0.52)    |
| Glu27Glu (reference)                                                   | Reference                   |
| Gln27Glu                                                               | 1.05 (0.35-3.18, P=0.93)    |
| Gln27Gln                                                               | 0.69 (0.13-3.57, P=0.65)    |
| <b>Middle part<br/>(severe exacerbations, adjusted for smoking)</b>    |                             |
| Gly16Gly (reference)                                                   | Reference                   |
| Gly16Arg                                                               | 1.60 (1.28-2.01, P=0.00004) |
| Arg16Arg                                                               | 1.44 (1.06-1.96, P=0.02)    |
| Glu27Glu (reference)                                                   | Reference                   |
| Gln27Glu                                                               | 1.39 (1.05-1.85, P=0.02)    |
| Gln27Gln                                                               | 1.50 (1.12-2.02, P=0.007)   |
| <b>Lower part<br/>(rare variant, severe exacerbations, unadjusted)</b> |                             |
| Thr164Thr (reference)                                                  | Reference                   |
| Thr164Ile/Ile164Ile                                                    | 1.10 (0.65-1.87, p=0.73)    |

HR=Hazard Ratio. 95% CI=95% Confidence Interval.

**Table S6.** Distribution of Gly16Arg (rs1042713) and Gln27Glu (rs1042714) genotypes among 94,483 individuals in the Copenhagen General Population Study with successful genotyping of both single nucleotide polymorphisms.

| Genotypes*                          | rs1042713                                |                                          |                                          |
|-------------------------------------|------------------------------------------|------------------------------------------|------------------------------------------|
|                                     | 16Gly homozygotes<br>N=36,500            | 16Gly/Arg heterozygotes<br>N=44,456      | 16Arg homozygotes<br>N=13,527            |
| rs1042714                           |                                          |                                          |                                          |
| 27Gln homozygotes<br>N=29,231       | Gly16Gly-Gln27Gln<br>N=3,067<br>(3.2%)   | Gly16Arg-Gln27Gln<br>N=12,717<br>(13.5%) | Arg16Arg-Gln27Gln<br>N=13,447<br>(14.2%) |
| 27Gln/Glu heterozygotes<br>N=46,765 | Gly16Gly-Gln27Glu<br>N=15,024<br>(15.9%) | Gly16Arg-Gln27Glu<br>N=31,675<br>(33.5%) | Arg16Arg-Gln27Glu<br>N=66<br>(0.1%)      |
| 27Glu homozygotes<br>N=18,487       | Gly16Gly-Glu27Glu<br>N=18,409<br>(19.5%) | Gly16Arg-Glu27Glu<br>N=64<br>(0.1%)      | Arg16Arg-Glu27Glu<br>N=14<br>(0.0%)      |

\*Non-random combinations of Gly16Arg and Gln27Glu reflecting linkage disequilibrium.
